# Supplementary material
Source: PubMed Central journal article supplement (PMC9982738)
Supplement: jamaophthalmol-e230004-s001.pdf [file jamaophthalmol-e230004-s001.pdf]

\*First name, last name, and suffix (if applicable) are required and will appear in PubMed.

| <b>*Group Name(s): IRIS Registry Analytic Center Consortium</b> |                   |                              |                  |                                                   |                                          |                                                         |                                                                                            |
|-----------------------------------------------------------------|-------------------|------------------------------|------------------|---------------------------------------------------|------------------------------------------|---------------------------------------------------------|--------------------------------------------------------------------------------------------|
| <b>*First Name and Middle Initial(s)</b>                        | <b>*Last Name</b> | <b>*Suffix (eg, Jr, III)</b> | Academic Degrees | Institution                                       | Location (city, state/province, country) | Role or Contribution, eg, chair, principal investigator | Group (if more than 1 Group listed in the byline) and/or Subgroup (eg, Steering Committee) |
| Suzann                                                          | Pershing          |                              | MD, MS           | Stanford University School of Medicine            | Palo Alto, California, USA               | Principal investigator                                  |                                                                                            |
| Leslie                                                          | Hyman             |                              | PhD              | Wills Eye Hospital                                | Philadelphia, PA, USA                    | Principal investigator                                  |                                                                                            |
| Julia A.                                                        | Haller            |                              | MD               | Wills Eye Hospital                                | Philadelphia, PA, USA                    | Principal investigator                                  |                                                                                            |
| Aaron Y.                                                        | Lee               |                              | MD, MSCI         | University of Washington                          | Seattle, WA, USA                         | Principal investigator                                  |                                                                                            |
| Cecelia S.                                                      | Lee               |                              | MD, MS           | University of Washington                          | Seattle, WA, USA                         | Principal investigator                                  |                                                                                            |
| Flora                                                           | Lum               |                              | MD               | American Academy of Ophthalmology                 | San Francisco, CA, USA                   | Principal investigator                                  |                                                                                            |
| Joan W.                                                         | Miller            |                              | MD               | Massachusetts Eye and Ear, Harvard Medical School | Boston, MA, USA                          | Principal investigator                                  |                                                                                            |
| Alice C.                                                        | Lorch             |                              | MD, MPH          | Massachusetts Eye and Ear, Harvard Medical School | Boston, MA, USA                          | Principal investigator                                  |                                                                                            |
