# Supplementary material
Source: PubMed Central journal article supplement (PMC9982738)
Supplement: jamaophthalmol-e230004-s002.pdf [file jamaophthalmol-e230004-s002.pdf]

## Data Sharing Statement

Oke. Factors Associated With Nasolacrimal Duct Probing Failure Among Children in the Intelligent Research in Sight Registry. *JAMA Ophthalmol.* Published March 02, 2023.  
doi:10.1001/jamaophthalmol.2023.0004

### Data

**Data available:** No
